# Supplementary material for: Microvascular invasion of hepatocellular carcinoma predicts microvascular invasion of its recurrence: potential implications for salvage liver transplantation?
Source: PubMed Central journal article supplement — Hepatobiliary Surg Nutr. 2022 Mar 3;12(2):183–91. doi: 10.21037/hbsn-21-346 (PMC10129893; doi:10.21037/hbsn-21-346), 2022-03-03
Supplement: hbsn-12-02-183-dss.pdf [file hbsn-12-02-183-dss.pdf]

## Data Sharing Statement

|                     |                                                                                                                                                     |                                                                                                                                                                     |
|---------------------|-----------------------------------------------------------------------------------------------------------------------------------------------------|---------------------------------------------------------------------------------------------------------------------------------------------------------------------|
| <b>Article Info</b> | <a href="https://dx.doi.org/10.21037/hbsn-21-346">https://dx.doi.org/10.21037/hbsn-21-346</a>                                                       |                                                                                                                                                                     |
| <b>Item</b>         | <b>Question</b>                                                                                                                                     | <b>Authors' Response<br/>(place "-" if not applicable)</b>                                                                                                          |
| 1                   | Would you like to share data collected for your study to others?                                                                                    | Under certain circumstances, yes                                                                                                                                    |
| 2                   | If not, would you like to share the reason for your decision?                                                                                       | --                                                                                                                                                                  |
| 3                   | What data in particular will be shared?                                                                                                             | All anonymous original data                                                                                                                                         |
| 4                   | Any other documents will be shared? Such as study protocol, statistical analysis plan, informed consent form, clinical study report, analytic code. | --                                                                                                                                                                  |
| 5                   | When will data availability begin?                                                                                                                  | From the publication date                                                                                                                                           |
| 6                   | When will data availability end?                                                                                                                    | 6 months after publication                                                                                                                                          |
| 7                   | To whom will you share the data?                                                                                                                    | Researchers                                                                                                                                                         |
| 8                   | For what type of analysis or purpose?                                                                                                               | Scientific analyses in the same field                                                                                                                               |
| 9                   | How or where can the data/documents be obtained?                                                                                                    | Upon personal request to the corresponding author                                                                                                                   |
| 10                  | Any other restrictions?                                                                                                                             | We may balance the potential benefits and risks for each request and then provide the data that could be shared.<br>Ethical approval for data sharing is mandatory. |
